# Supplementary material for: A new understanding on how heme metabolism occurs in heme oxygenase: water-assisted oxo mechanism
Source: Royal Society of Chemistry journal article supplement (doi:10.1039/c2dt30777d), 2012-01-01
Supplement: c2dt30777d.pdf [file c2dt30777d.pdf]

Supplementary Information

**A new understanding on how heme metabolism occurs  
in heme oxygenase: water-assisted oxo mechanism**

Takashi Kamachi, Tomonori Nishimi, and Kazunari Yoshizawa

*Institute for Materials Chemistry and Engineering and International Research Center  
for Molecular Systems, Kyushu University, Fukuoka 819-0395, Japan*

Fax: (+81) 92-802-2528

E-mail: [kazunari@ms.ifoc.kyushu-u.ac.jp](mailto:kazunari@ms.ifoc.kyushu-u.ac.jp)

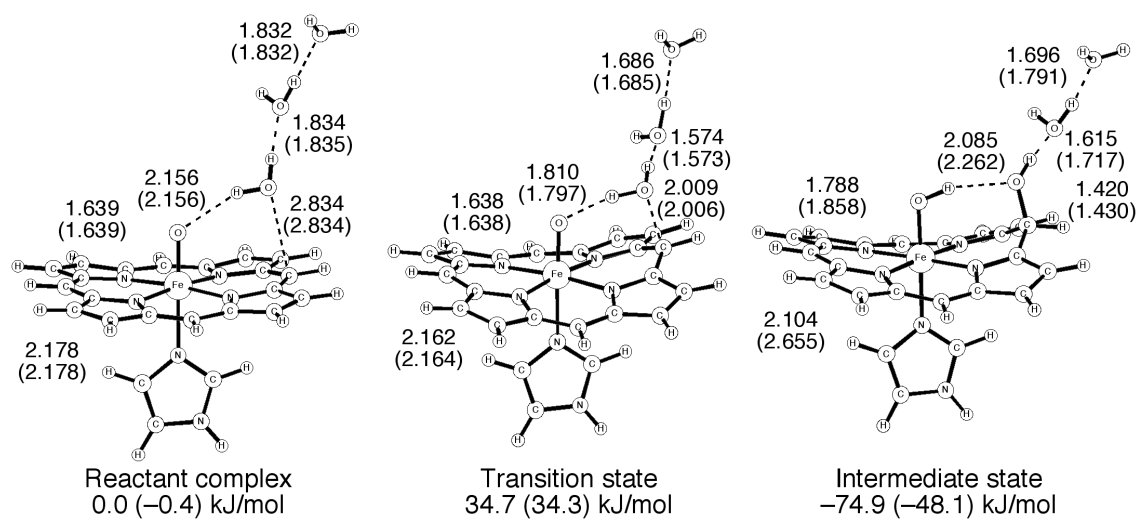

**Figure S1.** Computed geometrical and energetical changes in heme oxidation by the iron–oxo species with the aid of three water molecules in the doublet (quartet) state. Unit in Å.

**Table S1.** Calculated energy changes (kJ/mol) on the small model calculations. RC, TS, and I stands for reactant complex, transition state, and intermediate, respectively.

|                                                                | B3LYP/<br>6-311G(d,p) | B3LYP/<br>cc-pVTZ | M06/<br>cc-pVTZ | CAM-B3LYP/<br>cc-pVTZ |
|----------------------------------------------------------------|-----------------------|-------------------|-----------------|-----------------------|
| Doublet state with the bridging water molecule                 |                       |                   |                 |                       |
| RC                                                             | 0.0                   | 0.0               | 0.0             | 0.0                   |
| TS                                                             | 54.0                  | 64.9              | 59.0            | 54.8                  |
| I                                                              | -64.0                 | -60.7             | -78.7           | -97.9                 |
| Quartet state with the bridging water molecule                 |                       |                   |                 |                       |
| RC                                                             | -0.4                  | -0.4              | 0.0             | -0.4                  |
| TS                                                             | 53.6                  | 64.4              | 57.7            | 54.8                  |
| I                                                              | -13.4                 | -17.6             | -66.9           | -48.1                 |
| Doublet state with the bridging and additional water molecules |                       |                   |                 |                       |
| RC                                                             | 0.0                   | 0.0               | 0.0             | 0.0                   |
| TS                                                             | 23.8                  | 35.6              | 26.8            | 25.1                  |
| I                                                              | -86.2                 | -82.4             | -102.1          | -123.0                |
| Quartet state with the bridging and additional water molecules |                       |                   |                 |                       |
| RC                                                             | -0.4                  | -0.4              | -0.4            | -0.4                  |
| TS                                                             | 23.0                  | 34.7              | 25.9            | 25.1                  |
| I                                                              | -36.0                 | -39.7             | -92.0           | -74.1                 |

**Table S2.** Important Coulomb interactions (kJ/mol) between the QM and MM point charges.

|         | Doublet |      | Quartet |       |
|---------|---------|------|---------|-------|
|         | TS      | I    | TS      | I     |
| ARG136  | 31.9    | 14.2 | 32.3    | 16.9  |
| ASP140  | -26.7   | -8.0 | -27.0   | -8.2  |
| SER142  | -0.4    | -3.9 | -0.4    | -9.8  |
| GLY143  | 7.4     | 0.6  | 7.7     | -11.0 |
| LYS179  | -10.4   | -6.1 | -10.3   | -3.1  |
| ARG183  | -13.8   | -5.5 | -13.8   | -3.1  |
| HEM 300 | 40.7    | 17.8 | 41.0    | 11.2  |

**Table S3.** The QM/MM energy differences (kJ/mol) between the larger and smaller QM models.

|    | Smaller QM | Larger QM |
|----|------------|-----------|
|    | Doublet    |           |
| RC | 0.0        | 0.0       |
| TS | 76.1       | 83.7      |
| I  | -77.7      | -69.0     |
|    | Quartet    |           |
| RC | -1.2       | -1.2      |
| TS | 76.3       | 83.7      |
| I  | -39.4      | -36.0     |

**Table S4.** Amino acids in the distal heme pocket of P450s.

| PDB Code          | P450 family | Residue Name    | Residue Sequence | Distance [Å] |
|-------------------|-------------|-----------------|------------------|--------------|
| 1akd              | P450cam     |                 | $\alpha$ -meso   |              |
|                   |             | THR             | 252              | 3.318        |
|                   |             | GLY             | 248              | 4.655        |
|                   |             | VAL             | 253              | 4.662        |
|                   |             |                 | $\beta$ -meso    |              |
|                   |             | VAL             | 295              | 4.063        |
|                   |             |                 | $\gamma$ -meso   |              |
|                   |             | CAM (substrate) | 420              | 3.981        |
|                   |             | THR             | 101              | 4.914        |
|                   |             |                 | $\delta$ -meso   |              |
|                   |             | GLY             | 248              | 4.761        |
|                   |             | CAM (substrate) | 420              | 4.883        |
| LEU               | 245         | 4.996           |                  |              |
| 1t2b <sup>a</sup> | P450cin     |                 | $\alpha$ -meso   |              |
|                   |             | GLY             | 238              | 3.515        |

|      |          |                 |                |       |
|------|----------|-----------------|----------------|-------|
|      |          | THR             | 243            | 3.764 |
|      |          | ASN             | 242            | 3.946 |
|      |          |                 | $\beta$ -meso  |       |
|      |          | ASN             | 242            | 3.990 |
|      |          | CNL (substrate) | 500            | 4.087 |
|      |          | ALA             | 285            | 4.280 |
|      |          | HOH             | 504            | 4.794 |
|      |          |                 | $\gamma$ -meso |       |
|      |          | CNL (substrate) | 500            | 4.071 |
|      |          |                 | $\delta$ -meso |       |
|      |          | LEU             | 235            | 4.723 |
|      |          | ILE             | 234            | 4.831 |
|      |          | GLY             | 238            | 4.839 |
|      |          | CNL             | 500            | 4.937 |
| 2bmh | P450BM3  |                 | $\alpha$ -meso |       |
|      |          | THR             | 268            | 3.469 |
|      |          | THR             | 269            | 3.747 |
|      |          | GLY             | 265            | 4.226 |
|      |          | ALA             | 264            | 4.243 |
|      |          |                 | $\beta$ -meso  |       |
|      |          | ALA             | 328            | 3.831 |
|      |          | THR             | 268            | 4.928 |
|      |          |                 | $\gamma$ -meso |       |
|      |          | PHE             | 87             | 3.847 |
|      |          |                 | $\delta$ -meso |       |
|      |          | ALA             | 264            | 4.003 |
|      |          | GLY             | 265            | 4.824 |
| 3c6g | P450 2R1 |                 | $\alpha$ -meso |       |
|      |          | THR             | 314            | 3.179 |
|      |          | ALA             | 310            | 3.944 |

|                   |          |                |                |       |
|-------------------|----------|----------------|----------------|-------|
|                   |          | THR            | 315            | 4.239 |
|                   |          | GLY            | 311            | 4.590 |
|                   |          |                | $\beta$ -meso  |       |
|                   |          | VAL            | 375            | 3.842 |
|                   |          | THR            | 314            | 4.818 |
|                   |          |                | $\gamma$ -meso |       |
|                   |          | ILE            | 379            | 3.760 |
|                   |          |                | $\delta$ -meso |       |
|                   |          | ALA            | 310            | 3.298 |
|                   |          | LEU            | 307            | 4.721 |
|                   |          | GLY            | 311            | 4.786 |
| 1cl6 <sup>b</sup> | P450nor  |                | $\alpha$ -meso |       |
|                   |          | NO (substrate) | 502            | 3.877 |
|                   |          | GLY            | 240            | 3.959 |
|                   |          | MET            | 244            | 4.277 |
|                   |          |                | $\beta$ -meso  |       |
|                   |          | NO (substrate) | 502            | 3.590 |
|                   |          | SER            | 286            | 4.104 |
|                   |          |                | $\gamma$ -meso |       |
|                   |          | NO (substrate) | 502            | 3.837 |
|                   |          |                | $\delta$ -meso |       |
|                   |          | ALA            | 239            | 3.655 |
|                   |          | GLY            | 240            | 4.279 |
|                   |          | LEU            | 236            | 4.947 |
| 1cpt              | P450terp |                | $\alpha$ -meso |       |
|                   |          | THR            | 271            | 3.543 |
|                   |          | ALA            | 267            | 3.954 |
|                   |          | THR            | 272            | 4.097 |
|                   |          | GLY            | 268            | 4.591 |
|                   |          |                | $\beta$ -meso  |       |

|                   |            |                 |                |       |
|-------------------|------------|-----------------|----------------|-------|
|                   |            | VAL             | 314            | 3.618 |
|                   |            | THR             | 271            | 4.719 |
|                   |            |                 | $\gamma$ -meso |       |
|                   |            | PHE             | 317            | 4.729 |
|                   |            | THR             | 103            | 4.953 |
|                   |            |                 | $\delta$ -meso |       |
|                   |            | ALA             | 267            | 3.508 |
|                   |            | GLY             | 268            | 4.669 |
|                   |            | ILE             | 264            | 4.850 |
| 3e13              | P450 170A1 |                 | $\alpha$ -meso |       |
|                   |            | ILE             | 279            | 3.806 |
|                   |            | GLY             | 275            | 4.181 |
|                   |            | THR             | 278            | 4.460 |
|                   |            |                 | $\beta$ -meso  |       |
|                   |            | VAL             | 338            | 4.145 |
|                   |            | THR             | 278            | 4.720 |
|                   |            |                 | $\gamma$ -meso |       |
|                   |            | EL (substrate)  |                | 3.870 |
|                   |            |                 | $\delta$ -meso |       |
|                   |            | ILE             | 271            | 4.143 |
|                   |            | GLY             | 275            | 4.394 |
| 2d09 <sup>c</sup> | P450 158A2 |                 | $\alpha$ -meso |       |
|                   |            | GLY             | 242            | 3.755 |
|                   |            | ALA             | 245            | 3.939 |
|                   |            | VAL             | 246            | 4.900 |
|                   |            |                 | $\beta$ -meso  |       |
|                   |            | FLV (substrate) | 431            | 3.946 |
|                   |            | HOH             | 529            | 4.053 |
|                   |            | HIS             | 287            | 4.372 |
|                   |            | HOH             | 525            | 4.651 |

|      |          |                 |                |       |
|------|----------|-----------------|----------------|-------|
|      |          |                 | $\gamma$ -meso |       |
|      |          | FLV (substrate) | 431            | 3.245 |
|      |          | HOH             | 680            | 4.464 |
|      |          | HOH             | 664            | 4.673 |
|      |          | HOH             | 545            | 4.728 |
|      |          |                 | $\delta$ -meso |       |
|      |          | GLY             | 242            | 4.170 |
|      |          | HOH             | 664            | 4.226 |
|      |          | LEU             | 239            | 4.230 |
|      |          | LEU             | 238            | 4.232 |
| 1dt6 | P450 2C5 |                 | $\alpha$ -meso |       |
|      |          | THR             | 298            | 3.470 |
|      |          | THR             | 299            | 3.885 |
|      |          | ALA             | 294            | 4.465 |
|      |          | GLY             | 295            | 4.666 |
|      |          |                 | $\beta$ -meso  |       |
|      |          | LEU             | 359            | 4.452 |
|      |          | THR             | 298            | 4.723 |
|      |          |                 | $\gamma$ -meso |       |
|      |          | LEU             | 363            | 4.245 |
|      |          |                 | $\delta$ -meso |       |
|      |          | ALA             | 294            | 3.744 |
|      |          | GLY             | 295            | 4.056 |
|      |          | LEU             | 291            | 4.424 |
|      |          | ASP             | 290            | 4.676 |
| 3e4e | P450 2E1 |                 | $\alpha$ -meso |       |
|      |          | THR             | 303            | 3.042 |
|      |          | 4PZ (inhibitor) | 501            | 3.443 |
|      |          | ALA             | 299            | 3.647 |
|      |          | THR             | 304            | 4.281 |



|      |            |                 |                |       |
|------|------------|-----------------|----------------|-------|
|      |            |                 | $\beta$ -meso  |       |
|      |            | 4PZ (inhibitor) | 501            | 3.761 |
|      |            | VAL             | 364            | 3.924 |
|      |            | THR             | 303            | 4.982 |
|      |            |                 | $\gamma$ -meso |       |
|      |            | 4PZ (inhibitor) | 501            | 3.364 |
|      |            | LEU             | 368            | 4.042 |
|      |            |                 | $\delta$ -meso |       |
|      |            | ALA             | 299            | 3.380 |
|      |            | 4PZ (inhibitor) | 501            | 3.773 |
|      |            | LEU             | 296            | 4.893 |
| 3e5k | P450 105P1 |                 | $\alpha$ -meso |       |
|      |            | THR             | 242            | 3.921 |
|      |            | ALA             | 237            | 4.924 |
|      |            | THR             | 241            | 4.632 |
|      |            |                 | $\beta$ -meso  |       |
|      |            | PHE             | 286            | 3.617 |
|      |            |                 | $\gamma$ -meso |       |
|      |            | PIM (ligand)    |                | 3.885 |
|      |            | LEU             | 88             | 4.298 |
|      |            |                 | $\delta$ -meso |       |
|      |            | ALA             | 237            | 3.880 |
|      |            | LEU             | 234            | 4.597 |
| 1e9x | CYP51      |                 | $\alpha$ -meso |       |
|      |            | THR             | 260            | 3.386 |
|      |            | PIM (inhibitor) | 470            | 4.271 |
|      |            | ALA             | 256            | 4.340 |
|      |            | GLY             | 257            | 4.436 |
|      |            |                 | $\beta$ -meso  |       |
|      |            | LEU             | 321            | 4.046 |

|                   |           |                 |                |       |
|-------------------|-----------|-----------------|----------------|-------|
|                   |           | PIM (inhibitor) | 470            | 4.202 |
|                   |           | THR             | 260            | 4.863 |
|                   |           |                 | $\gamma$ -meso |       |
|                   |           | PIM (inhibitor) | 470            | 3.662 |
|                   |           |                 | $\delta$ -meso |       |
|                   |           | ALA             | 256            | 3.833 |
|                   |           | VAL             | 395            | 4.089 |
|                   |           | HIS             | 101            | 4.755 |
| 1egy <sup>d</sup> | P450eryF  |                 | $\alpha$ -meso |       |
|                   |           | 9AP (substrate) | 800            | 3.879 |
|                   |           | ALA             | 241            | 4.114 |
|                   |           | ALA             | 245            | 4.212 |
|                   |           | SER             | 246            | 4.785 |
|                   |           | GLY             | 242            | 4.886 |
|                   |           |                 | $\beta$ -meso  |       |
|                   |           | 9AP (substrate) | 800            | 3.278 |
|                   |           | PRO             | 288            | 4.419 |
|                   |           |                 | $\gamma$ -meso |       |
|                   |           | 9AP (substrate) | 800            | 3.321 |
|                   |           |                 | $\delta$ -meso |       |
|                   |           | 9AP (substrate) | 800            | 3.845 |
|                   |           | LEU             | 238            | 4.278 |
| 3eqm              | P450 19A1 |                 | $\alpha$ -meso |       |
|                   |           | THR             | 310            | 3.699 |
|                   |           | MET             | 311            | 4.628 |
|                   |           |                 | $\beta$ -meso  |       |
|                   |           | VAL             | 370            | 4.078 |
|                   |           |                 | $\gamma$ -meso |       |
|                   |           | ASD (ligand)    |                | 3.644 |
|                   |           | ARG             | 115            | 3.962 |
|                   |           |                 | $\delta$ -meso |       |

|      |          |                 |                |       |
|------|----------|-----------------|----------------|-------|
|      |          | ALA             | 306            | 4.167 |
| 1f4t | CYP119   |                 | $\alpha$ -meso |       |
|      |          | THR             | 213            | 3.328 |
|      |          | THR             | 214            | 3.872 |
|      |          | PIM (inhibitor) | 411            | 4.157 |
|      |          | GLY             | 210            | 4.245 |
|      |          |                 | $\beta$ -meso  |       |
|      |          | PIM (inhibitor) | 411            | 3.835 |
|      |          | VAL             | 254            | 3.970 |
|      |          |                 | $\gamma$ -meso |       |
|      |          | PIM (inhibitor) | 411            | 4.121 |
|      |          | LEU             | 69             | 4.200 |
|      |          |                 | $\delta$ -meso |       |
|      |          | PIM (inhibitor) | 411            | 4.041 |
| 2f9q | P450 2D6 |                 | $\alpha$ -meso |       |
|      |          | THR             | 309            | 3.221 |
|      |          | THR             | 310            | 3.997 |
|      |          | ALA             | 305            | 4.172 |
|      |          | GLY             | 306            | 4.325 |
|      |          |                 | $\beta$ -meso  |       |
|      |          | VAL             | 370            | 4.351 |
|      |          | THR             | 309            | 4.574 |
|      |          |                 | $\gamma$ -meso |       |
|      |          | PHE             | 120            | 4.099 |
|      |          |                 | $\delta$ -meso |       |
|      |          | ALA             | 305            | 3.728 |
|      |          | LEU             | 302            | 4.649 |
|      |          | GLY             | 306            | 4.685 |
| 2fdu | P450 2A6 |                 | $\alpha$ -meso |       |

|      |          |                 |                |       |
|------|----------|-----------------|----------------|-------|
|      |          | THR             | 305            | 3.318 |
|      |          | D1G (inhibitor) | 501            | 3.813 |
|      |          | GLY             | 301            | 4.046 |
|      |          | VAL             | 306            | 4.589 |
|      |          |                 | $\beta$ -meso  |       |
|      |          | D1G (inhibitor) | 501            | 3.798 |
|      |          | ILE             | 366            | 4.220 |
|      |          |                 | $\gamma$ -meso |       |
|      |          | D1G (inhibitor) | 501            | 3.574 |
|      |          | LEU             | 370            | 4.500 |
|      |          | ARG             | 101            | 4.894 |
|      |          |                 | $\delta$ -meso |       |
|      |          | D1G (inhibitor) | 501            | 3.389 |
|      |          | GLY             | 301            | 4.967 |
| 2fr7 | CYP199A2 |                 | $\alpha$ -meso |       |
|      |          | THR             | 255            | 3.321 |
|      |          | THR             | 256            | 4.014 |
|      |          | ALA             | 251            | 4.184 |
|      |          | GLY             | 252            | 4.403 |
|      |          |                 | $\beta$ -meso  |       |
|      |          | VAL             | 298            | 3.611 |
|      |          | THR             | 255            | 4.781 |
|      |          |                 | $\gamma$ -meso |       |
|      |          | LEU             | 100            | 4.416 |
|      |          |                 | $\delta$ -meso |       |
|      |          | ALA             | 251            | 3.548 |
|      |          | LEU             | 248            | 4.423 |
|      |          | GLY             | 252            | 4.561 |
| 2hi4 | P450 1A  |                 | $\alpha$ -meso |       |
|      |          | THR             | 321            | 3.090 |

|                   |            |                 |                |       |
|-------------------|------------|-----------------|----------------|-------|
|                   |            | VAL             | 322            | 4.716 |
|                   |            | ALA             | 317            | 4.741 |
|                   |            |                 | $\beta$ -meso  |       |
|                   |            | LEU             | 382            | 3.900 |
|                   |            | THR             | 321            | 4.618 |
|                   |            | BHF (inhibitor) | 800            | 4.624 |
|                   |            |                 | $\gamma$ -meso |       |
|                   |            | BHF (inhibitor) | 800            | 4.250 |
|                   |            |                 | $\delta$ -meso |       |
|                   |            | ALA             | 317            | 3.516 |
|                   |            | GLY             | 318            | 4.705 |
|                   |            | ASP             | 313            | 4.911 |
| 1izo <sup>e</sup> | P450 152A1 |                 | $\alpha$ -meso |       |
|                   |            | PRO             | 243            | 4.012 |
|                   |            | PAM (substrate) | 601            | 4.926 |
|                   |            | ILE             | 247            | 4.931 |
|                   |            |                 | $\beta$ -meso  |       |
|                   |            | PAM (substrate) | 601            | 4.143 |
|                   |            |                 | $\gamma$ -meso |       |
|                   |            |                 | $\delta$ -meso |       |
|                   |            | ASN             | 239            | 3.722 |
|                   |            | PRO             | 243            | 4.102 |
| 2j0d              | P450 3A4   |                 | $\alpha$ -meso |       |
|                   |            | THR             | 309            | 3.999 |
|                   |            | ALA             | 305            | 4.075 |
|                   |            | GLY             | 306            | 4.260 |
|                   |            | THR             | 310            | 4.571 |
|                   |            |                 | $\beta$ -meso  |       |
|                   |            | ERY (substrate) | 1498           | 4.011 |
|                   |            |                 | $\gamma$ -meso |       |

|                   |                       |                 |                |       |
|-------------------|-----------------------|-----------------|----------------|-------|
|                   |                       | ARG             | 105            | 4.001 |
|                   |                       | ERY (substrate) | 1498           | 4.227 |
|                   |                       |                 | $\delta$ -meso |       |
|                   |                       | ALA             | 305            | 3.646 |
|                   |                       | PHE             | 302            | 4.800 |
| 2jpp              | P450 113A1            |                 | $\alpha$ -meso |       |
|                   |                       | THR             | 245            | 3.663 |
|                   |                       | KLN (inhibitor) | 413            | 4.019 |
|                   |                       |                 | $\beta$ -meso  |       |
|                   |                       | KLN (inhibitor) | 413            | 3.569 |
|                   |                       | PHE             | 288            | 3.938 |
|                   |                       |                 | $\gamma$ -meso |       |
|                   |                       | KLN (inhibitor) | 413            | 3.843 |
|                   |                       |                 | $\delta$ -meso |       |
|                   |                       | KLN             | 413            | 3.496 |
|                   |                       | ALA             | 241            | 4.241 |
|                   |                       | LEU             | 238            | 4.572 |
| 11fk <sup>f</sup> | P450<br>Monooxygenase |                 | $\alpha$ -meso |       |
|                   |                       | ALA             | 236            | 3.961 |
|                   |                       | ASN             | 240            | 4.318 |
|                   |                       | GLY             | 237            | 4.322 |
|                   |                       | ILE             | 241            | 4.529 |
|                   |                       |                 | $\beta$ -meso  |       |
|                   |                       | ASN             | 240            | 3.936 |
|                   |                       | PRO             | 283            | 4.174 |
|                   |                       |                 | $\gamma$ -meso |       |
|                   |                       | MET             | 89             | 4.580 |
|                   |                       |                 | $\delta$ -meso |       |
|                   |                       | ALA             | 236            | 3.567 |

|      |          |              |                |       |
|------|----------|--------------|----------------|-------|
|      |          | GLY          | 237            | 4.929 |
| 2ij7 | CYP121   |              | $\alpha$ -meso |       |
|      |          | SER          | 237            | 3.819 |
|      |          | THR          | 238            | 4.227 |
|      |          | GLY          | 234            | 4.897 |
|      |          | ALA          | 233            | 4.852 |
|      |          |              | $\beta$ -meso  |       |
|      |          | PHE          | 280            | 3.521 |
|      |          | SER          | 237            | 4.916 |
|      |          |              | $\gamma$ -meso |       |
|      |          | TPF (ligand) |                | 3.852 |
|      |          |              | $\delta$ -meso |       |
|      |          | ALA          | 233            | 4.199 |
|      |          | GLY          | 234            | 4.832 |
|      |          | PHE          | 230            | 4.849 |
| 1n97 | CYP175A1 |              | $\alpha$ -meso |       |
|      |          | THR          | 225            | 3.581 |
|      |          | ALA          | 221            | 3.707 |
|      |          | VAL          | 226            | 4.300 |
|      |          | GLY          | 222            | 4.437 |
|      |          |              | $\beta$ -meso  |       |
|      |          | ALA          | 268            | 4.247 |
|      |          |              | $\gamma$ -meso |       |
|      |          | LEU          | 80             | 3.902 |
|      |          |              | $\delta$ -meso |       |
|      |          | ALA          | 221            | 3.395 |
|      |          | LEU          | 218            | 4.850 |
|      |          | GLY          | 222            | 4.975 |
| 3na0 | CYP11A1  |              | $\alpha$ -meso |       |

|      |          |                 |                |       |
|------|----------|-----------------|----------------|-------|
|      |          | THR             | 330            | 3.292 |
|      |          | GLY             | 326            | 4.327 |
|      |          | THR             | 331            | 4.900 |
|      |          | 2DC (substrate) | 602            | 4.963 |
|      |          |                 | $\beta$ -meso  |       |
|      |          | 2DC (substrate) | 602            | 3.997 |
|      |          | ILE             | 390            | 4.500 |
|      |          | SER             | 391            | 4.967 |
|      |          |                 | $\gamma$ -meso |       |
|      |          | 2DC (substrate) | 602            | 4.046 |
|      |          | ARG             | 120            | 4.067 |
|      |          |                 | $\delta$ -meso |       |
|      |          | 2DC (substrate) | 602            | 3.592 |
|      |          | GLY             | 326            | 4.547 |
| 1odo | CYP154A1 |                 | $\alpha$ -meso |       |
|      |          | THR             | 246            | 3.428 |
|      |          | PIM(inhibitor)  | 1408           | 3.960 |
|      |          | THR             | 247            | 4.002 |
|      |          | ALA             | 242            | 4.393 |
|      |          |                 | $\beta$ -meso  |       |
|      |          | PIM(inhibitor)  | 1408           | 4.074 |
|      |          | VAL             | 289            | 4.273 |
|      |          | THR             | 246            | 4.678 |
|      |          |                 | $\gamma$ -meso |       |
|      |          | PIM (inhibitor) | 1408           | 3.774 |
|      |          | PHE             | 88             | 4.547 |
|      |          |                 | $\delta$ -meso |       |
|      |          | ALA             | 242            | 3.749 |
|      |          | PIM (inhibitor) | 1408           | 4.083 |
|      |          | MET             | 239            | 4.717 |



|       |           |                 |                |       |
|-------|-----------|-----------------|----------------|-------|
| 1log2 | P450 2C9  |                 | $\alpha$ -meso |       |
|       |           | THR             | 302            | 3.629 |
|       |           | ALA             | 297            | 3.869 |
|       |           | THR             | 301            | 4.680 |
|       |           | GLY             | 298            | 4.887 |
|       |           |                 | $\beta$ -meso  |       |
|       |           | LEU             | 362            | 3.483 |
|       |           | THR             | 301            | 4.649 |
|       |           |                 | $\gamma$ -meso |       |
|       |           | LEU             | 366            | 4.786 |
|       |           |                 | $\delta$ -meso |       |
|       |           | ALA             | 297            | 3.559 |
|       |           | GLY             | 298            | 4.621 |
| 2p85  | P450 2A13 |                 | $\alpha$ -meso |       |
|       |           | THR             | 305            | 3.198 |
|       |           | ALA             | 301            | 4.085 |
|       |           | VAL             | 306            | 4.944 |
|       |           |                 | $\beta$ -meso  |       |
|       |           | MET             | 365            | 4.675 |
|       |           | LEU             | 366            | 4.735 |
|       |           |                 | $\gamma$ -meso |       |
|       |           | IND (substrate) | 507            | 3.588 |
|       |           | IND (substrate) | 501            | 4.212 |
|       |           | LEU             | 370            | 4.947 |
|       |           |                 | $\delta$ -meso |       |
|       |           | ALA             | 301            | 3.694 |
|       |           | IND (substrate) | 507            | 4.881 |
|       |           | LEU             | 298            | 4.947 |
| 1n6b  | P450 2C5  |                 | $\alpha$ -meso |       |
|       |           | THR             | 298            | 3.361 |

|      |           |              |                |       |
|------|-----------|--------------|----------------|-------|
|      |           | ALA          | 294            | 3.878 |
|      |           | GLY          | 295            | 4.187 |
|      |           | THR          | 299            | 4.124 |
|      |           |              | $\beta$ -meso  |       |
|      |           | LEU          | 359            | 4.329 |
|      |           |              | $\gamma$ -meso |       |
|      |           | DMZ (ligand) |                | 3.969 |
|      |           | ARG          | 97             | 4.996 |
|      |           |              | $\delta$ -meso |       |
|      |           | ALA          | 294            | 3.595 |
| 1pkf | P450epok  |              | $\alpha$ -meso |       |
|      |           | THR          | 258            | 3.483 |
|      |           | ALA          | 254            | 4.218 |
|      |           | THR          | 259            | 4.380 |
|      |           |              | $\beta$ -meso  |       |
|      |           | EPD (ligand) |                | 3.447 |
|      |           |              | $\gamma$ -meso |       |
|      |           | EPD (ligand) |                | 4.653 |
|      |           | PHE          | 96             | 4.810 |
|      |           |              | $\delta$ -meso |       |
|      |           | ALA          | 254            | 3.818 |
| 2q9f | P450 46A1 |              | $\alpha$ -meso |       |
|      |           | THR          | 306            | 3.572 |
|      |           | ALA          | 302            | 3.834 |
|      |           | SER          | 307            | 4.169 |
|      |           |              | $\beta$ -meso  |       |
|      |           | ALA          | 367            | 3.973 |
|      |           | THR          | 306            | 4.769 |
|      |           |              | $\gamma$ -meso |       |
|      |           | VAL          | 126            | 4.794 |

|      |          |     |                |       |
|------|----------|-----|----------------|-------|
|      |          |     | $\delta$ -meso |       |
|      |          | ALA | 302            | 3.764 |
|      |          | PHE | 299            | 4.487 |
|      |          | GLY | 303            | 4.736 |
| 2rfb | CYP231A2 |     | $\alpha$ -meso |       |
|      |          | THR | 201            | 3.183 |
|      |          | GLY | 197            | 3.462 |
|      |          | GLY | 198            | 4.188 |
|      |          | THR | 202            | 4.492 |
|      |          |     | $\beta$ -meso  |       |
|      |          | ILE | 241            | 3.644 |
|      |          | THR | 201            | 4.880 |
|      |          | HOH | 925            | 4.964 |
|      |          |     | $\gamma$ -meso |       |
|      |          | ILE | 57             | 4.340 |
|      |          |     | $\delta$ -meso |       |
|      |          | GLY | 197            | 4.061 |
|      |          | GLY | 198            | 4.362 |
|      |          | LEU | 194            | 4.819 |
|      |          | LEU | 193            | 4.902 |
| 1ue8 | P450     |     | $\alpha$ -meso |       |
|      |          | THR | 215            | 3.514 |
|      |          | THR | 214            | 3.594 |
|      |          | ALA | 210            | 3.967 |
|      |          | GLY | 211            | 4.152 |
|      |          |     | $\beta$ -meso  |       |
|      |          | VAL | 254            | 3.580 |
|      |          |     | $\gamma$ -meso |       |
|      |          | LEU | 69             | 4.115 |
|      |          |     | $\delta$ -meso |       |

|      |            |                 |                |       |
|------|------------|-----------------|----------------|-------|
|      |            | ALA             | 210            | 4.290 |
| 1ued | P450 Oxyc  |                 | $\alpha$ -meso |       |
|      |            | THR             | 249            | 3.302 |
|      |            | GLY             | 245            | 3.749 |
|      |            | GLY             | 246            | 4.500 |
|      |            | VAL             | 250            | 4.741 |
|      |            |                 | $\beta$ -meso  |       |
|      |            | VAL             | 292            | 3.607 |
|      |            | THR             | 249            | 4.905 |
|      |            | PG4 (substrate) | 4502           | 4.928 |
|      |            |                 | $\gamma$ -meso |       |
|      |            | PG4 (substrate) | 4502           | 3.718 |
|      |            |                 | $\delta$ -meso |       |
|      |            | GLY             | 245            | 3.913 |
|      |            | LEU             | 242            | 4.405 |
|      |            | GLY             | 246            | 4.413 |
|      |            | ALA             | 241            | 4.949 |
| 2ve3 | P450 120A1 |                 | $\alpha$ -meso |       |
|      |            | THR             | 258            | 2.960 |
|      |            | ALA             | 254            | 4.134 |
|      |            |                 | $\beta$ -meso  |       |
|      |            | VAL             | 318            | 3.498 |
|      |            |                 | $\gamma$ -meso |       |
|      |            | REA (ligand)    |                | 3.827 |
|      |            |                 | $\delta$ -meso |       |
|      |            | ALA             | 254            | 3.491 |
| 2wgy | P450 130   |                 | $\alpha$ -meso |       |
|      |            | THR             | 247            | 3.549 |
|      |            | ALA             | 243            | 3.827 |

|      |           |                 |                |       |
|------|-----------|-----------------|----------------|-------|
|      |           | VAL             | 248            | 4.231 |
|      |           | GLY             | 244            | 4.280 |
|      |           |                 | $\beta$ -meso  |       |
|      |           | VAL             | 290            | 3.618 |
|      |           | THR             | 247            | 4.749 |
|      |           |                 | $\gamma$ -meso |       |
|      |           | VAL             | 90             | 4.744 |
|      |           |                 | $\delta$ -meso |       |
|      |           | ALA             | 243            | 3.624 |
|      |           | MET             | 240            | 4.144 |
|      |           | GLY             | 244            | 4.856 |
| 2z36 | P450 MoxA |                 | $\alpha$ -meso |       |
|      |           | THR             | 249            | 3.528 |
|      |           | ALA             | 245            | 3.607 |
|      |           | GLY             | 246            | 4.089 |
|      |           | THR             | 250            | 4.280 |
|      |           |                 | $\beta$ -meso  |       |
|      |           | ALA             | 348            | 3.780 |
|      |           | MES (substrate) | 4574           | 4.424 |
|      |           | ALA             | 292            | 4.612 |
|      |           |                 | $\gamma$ -meso |       |
|      |           | MES (substrate) | 4574           | 3.822 |
|      |           | LEU             | 96             | 3.998 |
|      |           |                 | $\delta$ -meso |       |
|      |           | ALA             | 245            | 4.064 |
| 2z3u | P450StaP  |                 | $\alpha$ -meso |       |
|      |           | THR             | 258            | 3.145 |
|      |           | ALA             | 254            | 3.773 |
|      |           | THR             | 259            | 4.095 |
|      |           | PHE             | 357            | 4.986 |

|      |            |                 |                |       |
|------|------------|-----------------|----------------|-------|
|      |            |                 | $\beta$ -meso  |       |
|      |            | VAL             | 301            | 4.024 |
|      |            | THR             | 258            | 4.474 |
|      |            | CRR (substrate) | 501            | 4.552 |
|      |            |                 | $\gamma$ -meso |       |
|      |            | CRR (substrate) | 501            | 3.900 |
|      |            | VAL             | 99             | 4.932 |
|      |            |                 | $\delta$ -meso |       |
|      |            | ALA             | 254            | 4.167 |
|      |            | GLY             | 255            | 4.814 |
| 2zbx | P450 105A1 |                 | $\alpha$ -meso |       |
|      |            | THR             | 248            | 2.980 |
|      |            | ALA             | 244            | 4.561 |
|      |            | THR             | 249            | 4.917 |
|      |            |                 | $\beta$ -meso  |       |
|      |            | ALA             | 291            | 3.793 |
|      |            |                 | $\gamma$ -meso |       |
|      |            | ILE             | 96             | 4.366 |
|      |            |                 | $\delta$ -meso |       |
|      |            | ALA             | 244            | 3.501 |

---

<sup>a</sup>ASN242 is not essential for the enzymatic reaction, which is demonstrated by the N242A mutational study.

<sup>b</sup>Nitric oxide reductase. Amino acids to activate O<sub>2</sub> are not required.

<sup>c</sup>Bound dioxygen will be protonated by His287 in vicinity of the  $\beta$ -meso carbon atom.

<sup>d</sup>SER246 participates in the proton transfer.

<sup>e</sup>PAM is involved in the proton delivery.

<sup>f</sup>Inactive protein. See J.Biol.Chem. 2002, 277, 47476-47485.

## Coordinates

The optimized structure of the small model including the bridging water molecule of RC in the doublet state.

|    | X         | Y          | Z         |
|----|-----------|------------|-----------|
| H  | 3.291069  | -12.863004 | 1.944748  |
| C  | 2.507863  | -12.203592 | 1.576561  |
| C  | 2.421456  | -11.420539 | 0.452894  |
| H  | 3.154295  | -11.292242 | -0.340033 |
| N  | 1.320504  | -12.011408 | 2.250075  |
| H  | 1.053069  | -12.445571 | 3.128383  |
| C  | 0.567284  | -11.14247  | 1.537531  |
| H  | -0.424323 | -10.815193 | 1.844885  |
| N  | 1.20781   | -10.765539 | 0.442017  |
| O  | -2.578996 | -7.114547  | -1.721482 |
| O  | -0.073527 | -8.364193  | -2.18905  |
| H  | -3.117418 | -7.188933  | -2.527872 |
| H  | -1.675658 | -7.389109  | -1.992467 |
| Fe | 0.482363  | -9.397918  | -1.057265 |
| C  | 3.16939   | -10.006926 | -3.07685  |
| C  | -1.146884 | -12.096364 | -2.392025 |
| C  | -2.309589 | -8.577221  | 0.723149  |
| C  | 2.259679  | -6.988001  | 0.598108  |
| N  | 0.947572  | -10.8167   | -2.428848 |
| C  | 2.08256   | -10.86291  | -3.204977 |
| C  | 1.997542  | -11.953971 | -4.148793 |
| C  | 0.797591  | -12.566769 | -3.925508 |
| C  | 0.154275  | -11.830987 | -2.861306 |
| N  | -1.35207  | -10.226812 | -0.817466 |
| C  | -1.850878 | -11.330878 | -1.475173 |
| C  | -3.240734 | -11.528682 | -1.131172 |
| C  | -3.57962  | -10.50811  | -0.288956 |
| C  | -2.387777 | -9.712219  | -0.110539 |

|   |           |            |           |
|---|-----------|------------|-----------|
| N | 0.075099  | -8.096276  | 0.443626  |
| C | -1.155878 | -7.857891  | 1.007148  |
| C | -1.074219 | -6.761593  | 1.943654  |
| C | 0.225983  | -6.343834  | 1.938779  |
| C | 0.918862  | -7.173253  | 0.979291  |
| N | 2.371459  | -8.669466  | -1.181987 |
| C | 2.916933  | -7.658852  | -0.427524 |
| C | 4.251543  | -7.351851  | -0.891073 |
| C | 4.491575  | -8.176688  | -1.953058 |
| C | 3.308665  | -8.991023  | -2.113938 |
| H | 4.003475  | -10.150633 | -3.769239 |
| H | -1.669992 | -12.946804 | -2.83785  |
| H | -3.232978 | -8.255167  | 1.210145  |
| H | 2.816091  | -6.202159  | 1.115866  |
| H | 0.369464  | -13.428406 | -4.437917 |
| H | 2.764857  | -12.210845 | -4.879243 |
| H | 5.38389   | -8.239244  | -2.576492 |
| H | 4.904662  | -6.591175  | -0.462508 |
| H | 0.680688  | -5.533808  | 2.509275  |
| H | -1.911421 | -6.369914  | 2.521395  |
| H | -4.543513 | -10.30094  | 0.175744  |
| H | -3.869107 | -12.335315 | -1.51005  |

The optimized structure of the small model including the bridging water molecule of RC in the quartet state.

|   | X        | Y          | Z         |
|---|----------|------------|-----------|
| H | 3.291072 | -12.862989 | 1.944745  |
| C | 2.507898 | -12.203589 | 1.576556  |
| C | 2.421448 | -11.420505 | 0.452887  |
| H | 3.154302 | -11.292243 | -0.340001 |
| N | 1.320495 | -12.011414 | 2.250078  |
| H | 1.053095 | -12.445573 | 3.128337  |



|    |           |            |           |
|----|-----------|------------|-----------|
| C  | 0.5673    | -11.142491 | 1.537468  |
| H  | -0.424319 | -10.815237 | 1.844877  |
| N  | 1.207798  | -10.765491 | 0.441954  |
| O  | -2.57891  | -7.114719  | -1.721575 |
| O  | -0.07338  | -8.364327  | -2.188998 |
| H  | -3.117408 | -7.188957  | -2.527961 |
| H  | -1.675591 | -7.389136  | -1.992514 |
| Fe | 0.482149  | -9.397868  | -1.057274 |
| C  | 3.169527  | -10.006691 | -3.076657 |
| C  | -1.146679 | -12.096443 | -2.392192 |
| C  | -2.309771 | -8.577471  | 0.722999  |
| C  | 2.259381  | -6.987949  | 0.598301  |
| N  | 0.94768   | -10.81653  | -2.428669 |
| C  | 2.082385  | -10.863021 | -3.204994 |
| C  | 1.997577  | -11.953894 | -4.148737 |
| C  | 0.797514  | -12.566724 | -3.925474 |
| C  | 0.15399   | -11.831096 | -2.861228 |
| N  | -1.351804 | -10.226784 | -0.817661 |
| C  | -1.851056 | -11.330814 | -1.47506  |
| C  | -3.240702 | -11.528725 | -1.13125  |
| C  | -3.579566 | -10.508069 | -0.288998 |
| C  | -2.387891 | -9.711912  | -0.110407 |
| N  | 0.074959  | -8.096539  | 0.443572  |
| C  | -1.15574  | -7.857767  | 1.007231  |
| C  | -1.074239 | -6.761622  | 1.943656  |
| C  | 0.225995  | -6.343851  | 1.93878   |
| C  | 0.919248  | -7.173173  | 0.979316  |
| N  | 2.37128   | -8.669325  | -1.181829 |
| C  | 2.917113  | -7.658908  | -0.427704 |
| C  | 4.251537  | -7.351856  | -0.891089 |
| C  | 4.491547  | -8.176702  | -1.953044 |
| C  | 3.308761  | -8.99114   | -2.114192 |

|   |           |            |           |
|---|-----------|------------|-----------|
| H | 4.003448  | -10.150605 | -3.769213 |
| H | -1.67008  | -12.946793 | -2.837787 |
| H | -3.233006 | -8.255161  | 1.210183  |
| H | 2.816074  | -6.202186  | 1.11582   |
| H | 0.369448  | -13.428351 | -4.437861 |
| H | 2.764787  | -12.210825 | -4.879195 |
| H | 5.383887  | -8.239277  | -2.57655  |
| H | 4.904725  | -6.591158  | -0.462563 |
| H | 0.680685  | -5.533841  | 2.509244  |
| H | -1.911399 | -6.369922  | 2.521355  |
| H | -4.543403 | -10.300925 | 0.175778  |
| H | -3.869077 | -12.335327 | -1.510114 |

---

The optimized structure of the small model including the bridging water molecule of TS in the doublet state.

|    | X         | Y          | Z         |
|----|-----------|------------|-----------|
| H  | 3.306641  | -12.953592 | 1.600803  |
| C  | 2.525884  | -12.267369 | 1.279589  |
| C  | 2.383043  | -11.508693 | 0.145286  |
| H  | 3.051936  | -11.430256 | -0.708612 |
| N  | 1.406817  | -12.004575 | 2.041999  |
| H  | 1.193957  | -12.403764 | 2.951285  |
| C  | 0.636231  | -11.119459 | 1.370594  |
| H  | -0.311508 | -10.736818 | 1.745594  |
| N  | 1.201974  | -10.800056 | 0.216881  |
| O  | -2.416112 | -7.44826   | -1.485466 |
| O  | -0.237841 | -8.364493  | -2.315026 |
| H  | -3.133945 | -7.768956  | -2.07106  |
| H  | -1.478527 | -7.758261  | -1.926093 |
| Fe | 0.429599  | -9.436412  | -1.244444 |
| C  | 3.021358  | -9.75716   | -3.384722 |
| C  | -0.950873 | -12.350445 | -2.364006 |

|   |           |            |           |
|---|-----------|------------|-----------|
| C | -2.434636 | -8.433361  | 0.046705  |
| C | 2.208183  | -7.276327  | 0.704989  |
| N | 0.937435  | -10.795788 | -2.617626 |
| C | 2.001112  | -10.713688 | -3.471859 |
| C | 1.982857  | -11.828502 | -4.390483 |
| C | 0.909283  | -12.60326  | -4.046026 |
| C | 0.249683  | -11.936417 | -2.947885 |
| N | -1.340161 | -10.351783 | -1.004809 |
| C | -1.722753 | -11.586433 | -1.480477 |
| C | -3.087707 | -11.834865 | -1.119922 |
| C | -3.544946 | -10.694496 | -0.486257 |
| C | -2.436549 | -9.797273  | -0.435064 |
| N | -0.011255 | -8.220205  | 0.287352  |
| C | -1.258252 | -7.908777  | 0.70792   |
| C | -1.216388 | -6.963114  | 1.775445  |
| C | 0.119304  | -6.694717  | 1.9985    |
| C | 0.859531  | -7.448259  | 1.02695   |
| N | 2.268024  | -8.66154   | -1.325392 |
| C | 2.834675  | -7.782249  | -0.440093 |
| C | 4.144326  | -7.392616  | -0.907548 |
| C | 4.340508  | -8.02664   | -2.103955 |
| C | 3.167798  | -8.836311  | -2.340763 |
| H | 3.812945  | -9.79517   | -4.137824 |
| H | -1.374209 | -13.296816 | -2.711361 |
| H | -3.384493 | -8.080958  | 0.457084  |
| H | 2.793205  | -6.601847  | 1.336071  |
| H | 0.574154  | -13.534896 | -4.502911 |
| H | 2.714699  | -12.000292 | -5.180212 |
| H | -3.647211 | -12.74083  | -1.355046 |
| H | -4.54298  | -10.499869 | -0.091951 |
| H | -2.081589 | -6.544226  | 2.289723  |
| H | 0.552762  | -6.007574  | 2.725698  |

|   |          |           |           |
|---|----------|-----------|-----------|
| H | 4.813081 | -6.703441 | -0.391064 |
| H | 5.207505 | -7.97347  | -2.76296  |

The optimized structure of the small model including the bridging water molecule of TS in the quartet state.

|    | X         | Y          | Z         |
|----|-----------|------------|-----------|
| H  | 3.307087  | -12.953827 | 1.601984  |
| C  | 2.525973  | -12.268196 | 1.280381  |
| C  | 2.383037  | -11.509483 | 0.146048  |
| H  | 3.051412  | -11.430787 | -0.708219 |
| N  | 1.40686   | -12.005488 | 2.04281   |
| H  | 1.193752  | -12.404834 | 2.951987  |
| C  | 0.636392  | -11.120221 | 1.371302  |
| H  | -0.311275 | -10.73707  | 1.745978  |
| N  | 1.202166  | -10.800875 | 0.217691  |
| O  | -2.412449 | -7.450729  | -1.487185 |
| O  | -0.234568 | -8.364891  | -2.318015 |
| H  | -3.132688 | -7.767508  | -2.072241 |
| H  | -1.475134 | -7.760989  | -1.93037  |
| Fe | 0.427661  | -9.435544  | -1.244065 |
| C  | 3.021642  | -9.757399  | -3.384385 |
| C  | -0.949858 | -12.350855 | -2.362922 |
| C  | -2.433934 | -8.433299  | 0.046211  |
| C  | 2.208279  | -7.27727   | 0.705433  |
| N  | 0.937944  | -10.796229 | -2.616739 |
| C  | 2.000986  | -10.713032 | -3.472133 |
| C  | 1.982881  | -11.827833 | -4.390805 |
| C  | 0.90987   | -12.603181 | -4.045852 |
| C  | 0.25065   | -11.936824 | -2.947027 |
| N  | -1.339393 | -10.351915 | -1.003222 |
| C  | -1.721851 | -11.586754 | -1.479705 |
| C  | -3.087161 | -11.834709 | -1.120116 |

|   |           |            |           |
|---|-----------|------------|-----------|
| C | -3.544757 | -10.69428  | -0.486943 |
| C | -2.436328 | -9.797217  | -0.434907 |
| N | -0.011116 | -8.222141  | 0.288226  |
| C | -1.257891 | -7.908719  | 0.707268  |
| C | -1.216036 | -6.962909  | 1.774577  |
| C | 0.119581  | -6.695356  | 1.998324  |
| C | 0.859993  | -7.449868  | 1.027804  |
| N | 2.267893  | -8.662102  | -1.32488  |
| C | 2.834522  | -7.782832  | -0.439893 |
| C | 4.144003  | -7.392675  | -0.907423 |
| C | 4.340068  | -8.026335  | -2.104047 |
| C | 3.167331  | -8.835938  | -2.341081 |
| H | 3.813969  | -9.796648  | -4.136613 |
| H | -1.373775 | -13.296584 | -2.711297 |
| H | -3.383525 | -8.079941  | 0.456384  |
| H | 2.792633  | -6.600907  | 1.335166  |
| H | 0.575382  | -13.534867 | -4.50302  |
| H | 2.71429   | -11.999733 | -5.180859 |
| H | -3.646563 | -12.740864 | -1.35467  |
| H | -4.542759 | -10.499859 | -0.092414 |
| H | -2.0813   | -6.544964  | 2.289543  |
| H | 0.552927  | -6.007617  | 2.72506   |
| H | 4.813363  | -6.704685  | -0.390168 |
| H | 5.207185  | -7.97302   | -2.762803 |

The optimized structure of the small model including the bridging water molecule of I in the doublet state.

|   | X        | Y          | Z         |
|---|----------|------------|-----------|
| H | 3.127667 | -12.845712 | 1.923389  |
| C | 2.373067 | -12.160407 | 1.54348   |
| C | 2.312169 | -11.406352 | 0.398742  |
| H | 3.038991 | -11.331841 | -0.406394 |

|    |           |            |           |
|----|-----------|------------|-----------|
| N  | 1.20306   | -11.891988 | 2.223277  |
| H  | 0.924058  | -12.288868 | 3.115613  |
| C  | 0.485164  | -11.007813 | 1.494394  |
| H  | -0.486848 | -10.624515 | 1.799698  |
| N  | 1.131212  | -10.693548 | 0.38174   |
| O  | -2.596943 | -7.302992  | -1.047522 |
| O  | -0.013477 | -8.270221  | -2.430829 |
| H  | -3.431658 | -7.52007   | -1.501639 |
| H  | -0.823919 | -7.789612  | -2.165891 |
| Fe | 0.48861   | -9.378139  | -1.121052 |
| C  | 3.117615  | -9.87612   | -3.210756 |
| C  | -1.03842  | -12.182409 | -2.256676 |
| C  | -2.443302 | -8.15636   | 0.096916  |
| C  | 2.275665  | -7.161846  | 0.718465  |
| N  | 0.964697  | -10.779001 | -2.480851 |
| C  | 2.052997  | -10.778822 | -3.312919 |
| C  | 1.986411  | -11.895522 | -4.223554 |
| C  | 0.845792  | -12.585894 | -3.904119 |
| C  | 0.219633  | -11.857617 | -2.827441 |
| N  | -1.367864 | -10.140711 | -0.938259 |
| C  | -1.777206 | -11.396426 | -1.399915 |
| C  | -3.145153 | -11.624411 | -0.99798  |
| C  | -3.556601 | -10.484978 | -0.351309 |
| C  | -2.423461 | -9.595492  | -0.346403 |
| N  | 0.019247  | -8.02911   | 0.305634  |
| C  | -1.17711  | -7.691843  | 0.760528  |
| C  | -1.096118 | -6.742759  | 1.843579  |
| C  | 0.237455  | -6.495932  | 2.033401  |
| C  | 0.945664  | -7.274277  | 1.040171  |
| N  | 2.363716  | -8.665661  | -1.222528 |
| C  | 2.928976  | -7.753292  | -0.399816 |
| C  | 4.255237  | -7.407153  | -0.850488 |

|   |           |            |           |
|---|-----------|------------|-----------|
| C | 4.468399  | -8.120698  | -2.001393 |
| C | 3.283019  | -8.915449  | -2.21237  |
| H | 3.924628  | -9.974773  | -3.943448 |
| H | -1.50079  | -13.113932 | -2.597581 |
| H | -3.284581 | -8.006286  | 0.79724   |
| H | 2.879445  | -6.484311  | 1.32984   |
| H | 0.453837  | -13.492261 | -4.366204 |
| H | 2.724441  | -12.128356 | -4.991636 |
| H | 5.351344  | -8.124641  | -2.640993 |
| H | 4.924013  | -6.698483  | -0.361268 |
| H | 0.703209  | -5.818689  | 2.749915  |
| H | -1.945239 | -6.308861  | 2.37165   |
| H | -4.538217 | -10.268961 | 0.072237  |
| H | -3.723843 | -12.523499 | -1.213204 |

The optimized structure of the small model including the bridging water molecule of I in the quartet state.

|    | X         | Y          | Z         |
|----|-----------|------------|-----------|
| H  | 3.141575  | -13.004458 | 2.001445  |
| C  | 2.398457  | -12.294349 | 1.644097  |
| C  | 2.309202  | -11.550991 | 0.490723  |
| H  | 3.002377  | -11.518472 | -0.34841  |
| N  | 1.273682  | -11.97118  | 2.372242  |
| H  | 1.023485  | -12.344416 | 3.282736  |
| C  | 0.559842  | -11.066238 | 1.653758  |
| H  | -0.381451 | -10.640549 | 2.002576  |
| N  | 1.160545  | -10.792562 | 0.510793  |
| O  | -2.674175 | -7.265327  | -0.98194  |
| O  | -0.192479 | -8.059499  | -2.540997 |
| H  | -3.534124 | -7.467228  | -1.39416  |
| H  | -0.979252 | -7.540073  | -2.281905 |
| Fe | 0.434952  | -9.254286  | -1.295017 |

|   |           |            |           |
|---|-----------|------------|-----------|
| C | 3.151031  | -9.897981  | -3.218169 |
| C | -1.052657 | -12.150758 | -2.352746 |
| C | -2.452049 | -8.164901  | 0.114955  |
| C | 2.25592   | -7.100838  | 0.660207  |
| N | 0.964884  | -10.765461 | -2.545338 |
| C | 2.082982  | -10.793193 | -3.339692 |
| C | 2.030068  | -11.920337 | -4.234273 |
| C | 0.864067  | -12.586204 | -3.949783 |
| C | 0.213264  | -11.837223 | -2.906917 |
| N | -1.370862 | -10.110871 | -1.019287 |
| C | -1.782522 | -11.363062 | -1.491549 |
| C | -3.134333 | -11.60858  | -1.056037 |
| C | -3.533583 | -10.488348 | -0.369114 |
| C | -2.412758 | -9.586075  | -0.381894 |
| N | 0.012602  | -7.999686  | 0.289634  |
| C | -1.182094 | -7.687128  | 0.761401  |
| C | -1.100554 | -6.743261  | 1.849711  |
| C | 0.231385  | -6.471035  | 2.019085  |
| C | 0.935959  | -7.229435  | 1.009257  |
| N | 2.335981  | -8.618392  | -1.287072 |
| C | 2.897171  | -7.700713  | -0.459765 |
| C | 4.238496  | -7.391344  | -0.879044 |
| C | 4.475651  | -8.135637  | -2.006731 |
| C | 3.285807  | -8.91149   | -2.240649 |
| H | 3.986108  | -10.023417 | -3.913747 |
| H | -1.519173 | -13.079566 | -2.694509 |
| H | -3.27484  | -8.071612  | 0.846618  |
| H | 2.868647  | -6.418682  | 1.257258  |
| H | 0.476315  | -13.494559 | -4.411653 |
| H | 2.790377  | -12.177049 | -4.972425 |
| H | 5.380086  | -8.173444  | -2.614413 |
| H | 4.907945  | -6.690161  | -0.3802   |



|   |           |            |           |
|---|-----------|------------|-----------|
| H | 0.696163  | -5.785703  | 2.728532  |
| H | -1.948516 | -6.331322  | 2.39706   |
| H | -4.500975 | -10.293463 | 0.095407  |
| H | -3.710109 | -12.5083   | -1.274327 |

The optimized structure of the small model including the bridging and additional water molecules of RC in the doublet state.

|    | X         | Y          | Z         |
|----|-----------|------------|-----------|
| H  | 3.268652  | -12.865089 | 1.934588  |
| C  | 2.49076   | -12.198607 | 1.568031  |
| C  | 2.40736   | -11.417802 | 0.442462  |
| H  | 3.137163  | -11.298003 | -0.354721 |
| N  | 1.308495  | -11.991889 | 2.24675   |
| H  | 1.040235  | -12.421301 | 3.127075  |
| C  | 0.561448  | -11.116641 | 1.534856  |
| H  | -0.425747 | -10.778141 | 1.844687  |
| N  | 1.200982  | -10.750181 | 0.435586  |
| O  | -2.244225 | -4.489873  | -2.249388 |
| H  | -2.020101 | -4.516659  | -3.196797 |
| H  | -3.030313 | -3.918642  | -2.187402 |
| O  | -2.675258 | -7.159449  | -1.603693 |
| O  | -0.089262 | -8.348492  | -2.192488 |
| H  | -2.531862 | -6.186927  | -1.701332 |
| H  | -1.857494 | -7.568761  | -1.959488 |
| Fe | 0.478753  | -9.381975  | -1.066142 |
| C  | 3.168604  | -9.9844    | -3.085834 |
| C  | -1.128701 | -12.103822 | -2.376841 |
| C  | -2.329751 | -8.521714  | 0.645105  |
| C  | 2.264164  | -7.005202  | 0.627579  |
| N  | 0.948651  | -10.800023 | -2.439629 |
| C  | 2.0735    | -10.847364 | -3.213539 |
| C  | 1.999239  | -11.946245 | -4.147996 |

|   |           |            |           |
|---|-----------|------------|-----------|
| C | 0.805831  | -12.570703 | -3.916638 |
| C | 0.156092  | -11.833091 | -2.857907 |
| N | -1.350114 | -10.220648 | -0.819911 |
| C | -1.840605 | -11.329789 | -1.456285 |
| C | -3.230497 | -11.528252 | -1.119595 |
| C | -3.584141 | -10.488636 | -0.304767 |
| C | -2.398805 | -9.687337  | -0.127746 |
| N | 0.068686  | -8.07952   | 0.430287  |
| C | -1.153889 | -7.817229  | 0.960776  |
| C | -1.077022 | -6.735882  | 1.913914  |
| C | 0.231933  | -6.344113  | 1.948781  |
| C | 0.932743  | -7.17183   | 0.994443  |
| N | 2.369641  | -8.661311  | -1.18095  |
| C | 2.920564  | -7.676033  | -0.416764 |
| C | 4.257522  | -7.370088  | -0.868595 |
| C | 4.497024  | -8.17813   | -1.944967 |
| C | 3.311701  | -8.983218  | -2.124121 |
| H | 4.000493  | -10.131792 | -3.78018  |
| H | -1.649388 | -12.961767 | -2.811128 |
| H | -3.256253 | -8.175076  | 1.106861  |
| H | 2.833185  | -6.235699  | 1.156191  |
| H | 0.387299  | -13.442352 | -4.42027  |
| H | 2.769233  | -12.201096 | -4.876656 |
| H | 5.393212  | -8.236363  | -2.563273 |
| H | 4.913135  | -6.6216    | -0.422823 |
| H | 0.688132  | -5.553002  | 2.544278  |
| H | -1.920247 | -6.336803  | 2.477861  |
| H | -4.556858 | -10.272089 | 0.136696  |
| H | -3.853813 | -12.34336  | -1.488233 |

---

The optimized structure of the small model including the bridging and additional water molecules of RC in the quartet state.

|    | X         | Y          | Z         |
|----|-----------|------------|-----------|
| H  | 3.268669  | -12.865073 | 1.934587  |
| C  | 2.490751  | -12.198577 | 1.568017  |
| C  | 2.407331  | -11.417791 | 0.442463  |
| H  | 3.137172  | -11.297968 | -0.354733 |
| N  | 1.30849   | -11.991903 | 2.246731  |
| H  | 1.040245  | -12.421341 | 3.127092  |
| C  | 0.561447  | -11.116628 | 1.534812  |
| H  | -0.425765 | -10.778176 | 1.844698  |
| N  | 1.200945  | -10.750125 | 0.435435  |
| O  | -2.244184 | -4.489872  | -2.249439 |
| H  | -2.020125 | -4.516706  | -3.196866 |
| H  | -3.030287 | -3.918641  | -2.187446 |
| O  | -2.675171 | -7.159483  | -1.6036   |
| O  | -0.089248 | -8.348474  | -2.192699 |
| H  | -2.5318   | -6.186965  | -1.701324 |
| H  | -1.857509 | -7.568786  | -1.959526 |
| Fe | 0.478724  | -9.381915  | -1.06576  |
| C  | 3.168501  | -9.984508  | -3.085828 |
| C  | -1.128833 | -12.103734 | -2.376741 |
| C  | -2.329571 | -8.521623  | 0.645207  |
| C  | 2.264192  | -7.005226  | 0.627434  |
| N  | 0.948548  | -10.799947 | -2.439659 |
| C  | 2.073677  | -10.847317 | -3.213666 |
| C  | 1.999243  | -11.946276 | -4.148031 |
| C  | 0.805839  | -12.570723 | -3.916651 |
| C  | 0.156183  | -11.833096 | -2.857934 |
| N  | -1.349968 | -10.22052  | -0.819764 |
| C  | -1.840536 | -11.329985 | -1.45644  |
| C  | -3.230535 | -11.528211 | -1.11956  |
| C  | -3.584136 | -10.488671 | -0.30478  |
| C  | -2.398835 | -9.687321  | -0.127717 |

|   |           |            |           |
|---|-----------|------------|-----------|
| N | 0.068772  | -8.0796    | 0.430051  |
| C | -1.154176 | -7.817321  | 0.960844  |
| C | -1.076947 | -6.735859  | 1.913972  |
| C | 0.231855  | -6.344091  | 1.948786  |
| C | 0.93273   | -7.171779  | 0.994526  |
| N | 2.369529  | -8.661423  | -1.180987 |
| C | 2.920536  | -7.67594   | -0.416635 |
| C | 4.257538  | -7.370136  | -0.868633 |
| C | 4.497017  | -8.178163  | -1.94495  |
| C | 3.311748  | -8.98323   | -2.124159 |
| H | 4.000461  | -10.131822 | -3.780182 |
| H | -1.649406 | -12.961764 | -2.811187 |
| H | -3.256236 | -8.175036  | 1.106879  |
| H | 2.833122  | -6.235677  | 1.156201  |
| H | 0.387298  | -13.442341 | -4.420254 |
| H | 2.769277  | -12.20105  | -4.876629 |
| H | 5.393224  | -8.23635   | -2.563286 |
| H | 4.913114  | -6.621575  | -0.422821 |
| H | 0.688161  | -5.553039  | 2.544305  |
| H | -1.920252 | -6.336803  | 2.477864  |
| H | -4.556864 | -10.272068 | 0.136671  |
| H | -3.853813 | -12.343371 | -1.488229 |

The optimized structure of the small model including the bridging and additional water molecules of TS in the doublet state.

|   | X        | Y          | Z         |
|---|----------|------------|-----------|
| H | 3.249345 | -12.610164 | 2.152872  |
| C | 2.490085 | -11.966459 | 1.713529  |
| C | 2.449501 | -11.269487 | 0.531853  |
| H | 3.204454 | -11.21187  | -0.249123 |
| N | 1.288552 | -11.702507 | 2.337469  |
| H | 0.988447 | -12.063975 | 3.237735  |

|    |           |            |           |
|----|-----------|------------|-----------|
| C  | 0.572028  | -10.876913 | 1.540321  |
| H  | -0.420907 | -10.507573 | 1.791326  |
| N  | 1.24944   | -10.597055 | 0.438464  |
| O  | -2.376459 | -4.980184  | -1.059567 |
| H  | -2.590316 | -4.206125  | -1.609807 |
| H  | -1.622475 | -4.739829  | -0.491969 |
| O  | -2.47863  | -7.502873  | -1.823368 |
| O  | 0.002519  | -8.368343  | -2.373824 |
| H  | -2.441266 | -6.518918  | -1.606669 |
| H  | -1.576037 | -7.772803  | -2.192137 |
| Fe | 0.579477  | -9.342503  | -1.185021 |
| C  | 3.398756  | -9.752209  | -3.02215  |
| C  | -0.630366 | -12.344851 | -2.274425 |
| C  | -2.430514 | -8.405542  | -0.130866 |
| C  | 2.112053  | -6.968667  | 0.734319  |
| N  | 1.252842  | -10.773016 | -2.419916 |
| C  | 2.40535   | -10.726957 | -3.156366 |
| C  | 2.502266  | -11.896892 | -3.999197 |
| C  | 1.40366   | -12.664666 | -3.728872 |
| C  | 0.622016  | -11.940006 | -2.753592 |
| N  | -1.18405  | -10.299965 | -1.045981 |
| C  | -1.492624 | -11.561626 | -1.507494 |
| C  | -2.879206 | -11.84244  | -1.250545 |
| C  | -3.41576  | -10.70213  | -0.696591 |
| C  | -2.338034 | -9.767371  | -0.584471 |
| N  | -0.03316  | -8.039286  | 0.221174  |
| C  | -1.324109 | -7.765877  | 0.527477  |
| C  | -1.403889 | -6.71843   | 1.49882   |
| C  | -0.102123 | -6.354654  | 1.78128   |
| C  | 0.740679  | -7.160788  | 0.94299   |
| N  | 2.410737  | -8.517992  | -1.14859  |
| C  | 2.865469  | -7.553782  | -0.286616 |

|   |           |            |           |
|---|-----------|------------|-----------|
| C | 4.214017  | -7.172906  | -0.640852 |
| C | 4.548778  | -7.900471  | -1.748934 |
| C | 3.417848  | -8.751982  | -2.040913 |
| H | 4.270843  | -9.830547  | -3.676908 |
| H | -1.002023 | -13.315706 | -2.613233 |
| H | -3.423161 | -8.086647  | 0.193418  |
| H | 2.613295  | -6.221574  | 1.356063  |
| H | 1.129353  | -13.628845 | -4.15802  |
| H | 3.320929  | -12.105336 | -4.68852  |
| H | 5.482114  | -7.884017  | -2.312507 |
| H | 4.813351  | -6.429282  | -0.114582 |
| H | 0.247587  | -5.593146  | 2.479411  |
| H | -2.324632 | -6.31578   | 1.922171  |
| H | -4.448805 | -10.517894 | -0.400688 |
| H | -3.389207 | -12.772694 | -1.502624 |

---

The optimized structure of the small model including the bridging and additional water molecules of TS in the quartet state.

|   | X         | Y          | Z         |
|---|-----------|------------|-----------|
| H | 3.260508  | -12.606413 | 2.153468  |
| C | 2.497585  | -11.96576  | 1.716171  |
| C | 2.452461  | -11.266333 | 0.536176  |
| H | 3.205885  | -11.203887 | -0.245874 |
| N | 1.294814  | -11.710007 | 2.341156  |
| H | 0.997254  | -12.075809 | 3.240532  |
| C | 0.573283  | -10.886627 | 1.545891  |
| H | -0.422463 | -10.525167 | 1.797295  |
| N | 1.24898   | -10.599962 | 0.444735  |
| O | -2.38311  | -4.975455  | -1.069577 |
| H | -2.586423 | -4.198088  | -1.619053 |
| H | -1.640634 | -4.738265  | -0.485522 |
| O | -2.480167 | -7.500896  | -1.827437 |

|    |           |            |           |
|----|-----------|------------|-----------|
| O  | 0.010404  | -8.370923  | -2.373521 |
| H  | -2.445371 | -6.515674  | -1.615911 |
| H  | -1.578618 | -7.770438  | -2.19514  |
| Fe | 0.578526  | -9.340883  | -1.178343 |
| C  | 3.395119  | -9.743788  | -3.020434 |
| C  | -0.627834 | -12.34372  | -2.266001 |
| C  | -2.431272 | -8.401703  | -0.131445 |
| C  | 2.110899  | -6.971429  | 0.744992  |
| N  | 1.254044  | -10.770838 | -2.413297 |
| C  | 2.401949  | -10.71852  | -3.156902 |
| C  | 2.493599  | -11.882401 | -4.009019 |
| C  | 1.397207  | -12.652759 | -3.736846 |
| C  | 0.621794  | -11.93589  | -2.750363 |
| N  | -1.182875 | -10.298373 | -1.038836 |
| C  | -1.489787 | -11.561723 | -1.496926 |
| C  | -2.876666 | -11.842399 | -1.240468 |
| C  | -3.414941 | -10.700019 | -0.692239 |
| C  | -2.337962 | -9.764253  | -0.5821   |
| N  | -0.034436 | -8.038679  | 0.22602   |
| C  | -1.325893 | -7.762469  | 0.528     |
| C  | -1.406071 | -6.716818  | 1.501474  |
| C  | -0.104406 | -6.356743  | 1.789064  |
| C  | 0.739087  | -7.16302   | 0.951715  |
| N  | 2.409989  | -8.517779  | -1.139836 |
| C  | 2.864357  | -7.554185  | -0.277162 |
| C  | 4.211028  | -7.168796  | -0.634331 |
| C  | 4.544655  | -7.892896  | -1.744962 |
| C  | 3.415172  | -8.746816  | -2.036008 |
| H  | 4.265628  | -9.817349  | -3.677801 |
| H  | -0.999676 | -13.314248 | -2.605535 |
| H  | -3.424246 | -8.081349  | 0.189788  |
| H  | 2.611173  | -6.224583  | 1.367664  |

|   |           |            |           |
|---|-----------|------------|-----------|
| H | 1.120396  | -13.61309  | -4.172813 |
| H | 3.306664  | -12.085587 | -4.706513 |
| H | 5.476083  | -7.87208   | -2.311487 |
| H | 4.809173  | -6.423813  | -0.108648 |
| H | 0.244754  | -5.597595  | 2.490178  |
| H | -2.327304 | -6.314675  | 1.924438  |
| H | -4.448419 | -10.514862 | -0.398735 |
| H | -3.386516 | -12.773438 | -1.489839 |

The optimized structure of the small model including the bridging and additional water molecules of I in the doublet state.

|    | X         | Y          | Z         |
|----|-----------|------------|-----------|
| H  | 3.113543  | -12.741758 | 2.095263  |
| C  | 2.371397  | -12.085826 | 1.64511   |
| C  | 2.361117  | -11.383815 | 0.46637   |
| H  | 3.129718  | -11.332525 | -0.301301 |
| N  | 1.161634  | -11.809403 | 2.248157  |
| H  | 0.840996  | -12.171252 | 3.141129  |
| C  | 0.470795  | -10.971339 | 1.441978  |
| H  | -0.522215 | -10.592054 | 1.676173  |
| N  | 1.171664  | -10.694427 | 0.353415  |
| O  | -3.714237 | -5.266003  | -0.668395 |
| H  | -4.629481 | -5.073798  | -0.94118  |
| H  | -3.21396  | -4.440254  | -0.795948 |
| O  | -2.640169 | -7.593805  | -1.510248 |
| O  | 0.125308  | -8.422754  | -2.622627 |
| H  | -3.008929 | -6.696536  | -1.296709 |
| H  | -0.771699 | -8.055129  | -2.479994 |
| Fe | 0.582704  | -9.461297  | -1.24227  |
| C  | 3.369019  | -9.95508   | -3.122412 |
| C  | -0.766491 | -12.368808 | -2.353901 |
| C  | -2.473502 | -8.307862  | -0.290035 |



|   |           |            |           |
|---|-----------|------------|-----------|
| C | 2.160633  | -7.088135  | 0.598211  |
| N | 1.199673  | -10.902078 | -2.503341 |
| C | 2.344894  | -10.89395  | -3.260759 |
| C | 2.375057  | -12.045209 | -4.128767 |
| C | 1.237763  | -12.761928 | -3.858851 |
| C | 0.518046  | -12.016491 | -2.855533 |
| N | -1.255904 | -10.28628  | -1.153005 |
| C | -1.585681 | -11.579645 | -1.585222 |
| C | -2.972928 | -11.842152 | -1.267779 |
| C | -3.46959  | -10.692725 | -0.714342 |
| C | -2.370179 | -9.758264  | -0.672202 |
| N | -0.027098 | -8.078177  | 0.091058  |
| C | -1.268001 | -7.770631  | 0.43975   |
| C | -1.298007 | -6.748823  | 1.460072  |
| C | 0.009049  | -6.430458  | 1.721443  |
| C | 0.814956  | -7.238219  | 0.832704  |
| N | 2.436301  | -8.680023  | -1.253193 |
| C | 2.912468  | -7.711506  | -0.435267 |
| C | 4.257188  | -7.344058  | -0.805383 |
| C | 4.575911  | -8.104309  | -1.901244 |
| C | 3.43255   | -8.944526  | -2.158616 |
| H | 4.230431  | -10.058978 | -3.789439 |
| H | -1.170003 | -13.330636 | -2.685148 |
| H | -3.360755 | -8.176903  | 0.355722  |
| H | 2.693245  | -6.353408  | 1.209852  |
| H | 0.906712  | -13.698244 | -4.308728 |
| H | 3.170349  | -12.281459 | -4.836325 |
| H | 5.504529  | -8.110353  | -2.472782 |
| H | 4.867032  | -6.59136   | -0.304823 |
| H | 0.399038  | -5.691136  | 2.422138  |
| H | -2.200579 | -6.320812  | 1.896382  |
| H | -4.487603 | -10.486405 | -0.383129 |

---

|   |           |            |           |
|---|-----------|------------|-----------|
| H | -3.500286 | -12.772142 | -1.483119 |
|---|-----------|------------|-----------|

---

The optimized structure of the small model including the bridging and additional water molecules of I in the quartet state.

---

|    | X         | Y          | Z         |
|----|-----------|------------|-----------|
| H  | 3.161201  | -12.830213 | 2.205232  |
| C  | 2.411609  | -12.17461  | 1.767071  |
| C  | 2.381927  | -11.459332 | 0.593214  |
| H  | 3.145137  | -11.398818 | -0.181714 |
| N  | 1.207507  | -11.909215 | 2.384107  |
| H  | 0.897471  | -12.279726 | 3.276901  |
| C  | 0.508373  | -11.064201 | 1.582074  |
| H  | -0.485937 | -10.692958 | 1.832367  |
| N  | 1.192656  | -10.774516 | 0.492229  |
| O  | -3.718732 | -5.241902  | -0.643484 |
| H  | -4.633973 | -5.009499  | -0.883299 |
| H  | -3.186485 | -4.440528  | -0.79487  |
| O  | -2.704501 | -7.577769  | -1.526369 |
| O  | -0.068507 | -8.248967  | -2.791704 |
| H  | -3.071998 | -6.684025  | -1.294377 |
| H  | -0.979073 | -7.909153  | -2.670245 |
| Fe | 0.537059  | -9.325516  | -1.429401 |
| C  | 3.392253  | -9.949401  | -3.140716 |
| C  | -0.772455 | -12.343819 | -2.400009 |
| C  | -2.485058 | -8.296872  | -0.317303 |
| C  | 2.163094  | -7.053836  | 0.551455  |
| N  | 1.185352  | -10.852273 | -2.562156 |
| C  | 2.353713  | -10.870092 | -3.289396 |
| C  | 2.39622   | -12.039685 | -4.126491 |
| C  | 1.247249  | -12.744398 | -3.86784  |
| C  | 0.506981  | -11.977139 | -2.901848 |
| N  | -1.270972 | -10.267792 | -1.204978 |

|   |           |            |           |
|---|-----------|------------|-----------|
| C | -1.594883 | -11.564643 | -1.627294 |
| C | -2.971359 | -11.840901 | -1.280721 |
| C | -3.467728 | -10.693833 | -0.720621 |
| C | -2.378613 | -9.746052  | -0.705754 |
| N | -0.025652 | -8.028646  | 0.016607  |
| C | -1.268171 | -7.750559  | 0.388174  |
| C | -1.295094 | -6.761007  | 1.437442  |
| C | 0.011226  | -6.431694  | 1.692607  |
| C | 0.816005  | -7.202995  | 0.77463   |
| N | 2.438465  | -8.638474  | -1.306713 |
| C | 2.916044  | -7.67454   | -0.479802 |
| C | 4.272916  | -7.338138  | -0.821193 |
| C | 4.603103  | -8.112369  | -1.906058 |
| C | 3.452369  | -8.929946  | -2.186568 |
| H | 4.26896   | -10.083441 | -3.781089 |
| H | -1.159553 | -13.314146 | -2.724102 |
| H | -3.352855 | -8.181233  | 0.356578  |
| H | 2.697284  | -6.336008  | 1.180517  |
| H | 0.925066  | -13.692653 | -4.298282 |
| H | 3.209129  | -12.297378 | -4.805691 |
| H | 5.544453  | -8.139377  | -2.455581 |
| H | 4.887919  | -6.598696  | -0.307747 |
| H | 0.399362  | -5.709027  | 2.411616  |
| H | -2.197391 | -6.363481  | 1.901821  |
| H | -4.478604 | -10.501434 | -0.360712 |
| H | -3.495442 | -12.775787 | -1.482929 |

The coordinates for the atoms in the QM region of the QM/MM optimized structure of RC in the doublet state.

|   | X        | Y          | Z        |
|---|----------|------------|----------|
| C | 3.299052 | -11.197858 | 3.563927 |
| H | 3.808674 | -12.165021 | 3.695943 |

|    |           |            |           |
|----|-----------|------------|-----------|
| H  | 4.066115  | -10.409288 | 3.506077  |
| C  | 2.464463  | -11.197095 | 2.320706  |
| C  | 2.298455  | -10.257513 | 1.334727  |
| H  | 2.857132  | -9.336387  | 1.205347  |
| N  | 1.545241  | -12.184485 | 2.017565  |
| H  | 1.434060  | -13.065156 | 2.519076  |
| C  | 0.856653  | -11.822021 | 0.916165  |
| H  | 0.075337  | -12.439002 | 0.472482  |
| N  | 1.290015  | -10.648502 | 0.473872  |
| O  | -4.353662 | -3.863312  | -2.24877  |
| H  | -3.682175 | -3.308762  | -2.694556 |
| H  | -3.849765 | -4.447867  | -1.620739 |
| O  | -4.753969 | -3.586972  | 1.609692  |
| H  | -5.336191 | -3.276989  | 0.837180  |
| H  | -5.325339 | -4.128512  | 2.179565  |
| O  | -3.200047 | -5.065351  | -0.127278 |
| H  | -3.686842 | -4.625129  | 0.616759  |
| H  | -2.258666 | -4.806308  | -0.072048 |
| O  | -5.842186 | -2.720259  | -0.550641 |
| H  | -5.356182 | -3.153544  | -1.348884 |
| H  | -6.748306 | -2.489276  | -0.805845 |
| O  | -3.053034 | -7.596977  | -1.309816 |
| O  | -0.242619 | -8.374271  | -2.090012 |
| H  | -3.128096 | -6.738495  | -0.844354 |
| H  | -2.116769 | -7.686037  | -1.583553 |
| Fe | 0.424528  | -9.409815  | -1.007399 |
| C  | 3.229063  | -10.057365 | -2.853989 |
| C  | -1.1925   | -11.987174 | -2.560886 |
| C  | -2.255591 | -8.97895   | 1.063168  |
| C  | 1.989436  | -6.7442    | 0.433811  |
| N  | 0.913489  | -10.748937 | -2.440379 |
| C  | 2.106814  | -10.834404 | -3.106071 |

|   |           |            |           |
|---|-----------|------------|-----------|
| C | 2.034832  | -11.827703 | -4.148254 |
| C | 0.760908  | -12.320361 | -4.125249 |
| C | 0.087224  | -11.65704  | -3.030019 |
| N | -1.327332 | -10.389492 | -0.705403 |
| C | -1.826567 | -11.424443 | -1.457382 |
| C | -3.154629 | -11.770288 | -1.008023 |
| C | -3.467419 | -10.904625 | -0.001875 |
| C | -2.315891 | -10.052001 | 0.166898  |
| N | -0.023866 | -8.143187  | 0.516171  |
| C | -1.197733 | -8.08466   | 1.212037  |
| C | -1.206387 | -6.934158  | 2.082897  |
| C | -0.007892 | -6.298323  | 1.898998  |
| C | 0.712125  | -7.069965  | 0.914402  |
| N | 2.268176  | -8.577869  | -1.161003 |
| C | 2.718134  | -7.456236  | -0.51328  |
| C | 4.069224  | -7.146534  | -0.923495 |
| C | 4.433250  | -8.114284  | -1.814751 |
| C | 3.290581  | -8.983243  | -1.958382 |
| H | 4.125353  | -10.269436 | -3.438874 |
| H | -1.737432 | -12.759408 | -3.101245 |
| H | -3.139828 | -8.813164  | 1.681185  |
| H | 2.462536  | -5.860099  | 0.857050  |

The coordinates for the atoms in the QM region of the QM/MM optimized structure of RC in the quartet state.

|   | X        | Y          | Z        |
|---|----------|------------|----------|
| C | 3.301613 | -11.199909 | 3.565412 |
| H | 3.807797 | -12.169241 | 3.695543 |
| H | 4.070088 | -10.412837 | 3.507022 |
| C | 2.466975 | -11.197535 | 2.322260 |
| C | 2.299605 | -10.258706 | 1.335952 |
| H | 2.856302 | -9.336959  | 1.208135 |

|    |           |            |           |
|----|-----------|------------|-----------|
| N  | 1.547987  | -12.1849   | 2.019846  |
| H  | 1.439921  | -13.066815 | 2.519621  |
| C  | 0.858472  | -11.823059 | 0.919002  |
| H  | 0.073547  | -12.437747 | 0.480346  |
| N  | 1.291312  | -10.649837 | 0.475167  |
| O  | -4.349671 | -3.859594  | -2.240482 |
| H  | -3.683954 | -3.297051  | -2.68467  |
| H  | -3.841545 | -4.436683  | -1.607592 |
| O  | -4.75757  | -3.581726  | 1.613641  |
| H  | -5.342687 | -3.277284  | 0.840699  |
| H  | -5.328567 | -4.106363  | 2.199518  |
| O  | -3.207024 | -5.060671  | -0.127001 |
| H  | -3.695551 | -4.62237   | 0.617358  |
| H  | -2.263297 | -4.811359  | -0.065859 |
| O  | -5.838772 | -2.719673  | -0.54694  |
| H  | -5.351801 | -3.156708  | -1.344069 |
| H  | -6.733231 | -2.455651  | -0.810766 |
| O  | -3.045874 | -7.590376  | -1.331967 |
| O  | -0.241695 | -8.378919  | -2.08836  |
| H  | -3.126447 | -6.732599  | -0.867062 |
| H  | -2.111046 | -7.672655  | -1.612225 |
| Fe | 0.425536  | -9.410496  | -1.001841 |
| C  | 3.231985  | -10.05834  | -2.851912 |
| C  | -1.189514 | -11.988183 | -2.559678 |
| C  | -2.253131 | -8.984015  | 1.069368  |
| C  | 1.989445  | -6.74271   | 0.433821  |
| N  | 0.915608  | -10.748356 | -2.440874 |
| C  | 2.109022  | -10.83555  | -3.105085 |
| C  | 2.038729  | -11.830661 | -4.146297 |
| C  | 0.764596  | -12.323115 | -4.123572 |
| C  | 0.089220  | -11.657805 | -3.030109 |
| N  | -1.324698 | -10.392617 | -0.700769 |

|   |           |            |           |
|---|-----------|------------|-----------|
| C | -1.824513 | -11.424665 | -1.455329 |
| C | -3.154099 | -11.770023 | -1.008389 |
| C | -3.466583 | -10.905783 | -0.00013  |
| C | -2.314148 | -10.055253 | 0.172247  |
| N | -0.021053 | -8.146946  | 0.521123  |
| C | -1.194957 | -8.088069  | 1.216261  |
| C | -1.206041 | -6.933856  | 2.082409  |
| C | -0.00873  | -6.295896  | 1.896618  |
| C | 0.713455  | -7.069901  | 0.915603  |
| N | 2.269106  | -8.57667   | -1.160393 |
| C | 2.719147  | -7.455237  | -0.513843 |
| C | 4.069936  | -7.145392  | -0.925167 |
| C | 4.434178  | -8.112795  | -1.81675  |
| C | 3.291849  | -8.982306  | -1.959194 |
| H | 4.130508  | -10.274929 | -3.432356 |
| H | -1.733404 | -12.761995 | -3.09916  |
| H | -3.137707 | -8.816499  | 1.686551  |
| H | 2.461013  | -5.856345  | 0.854054  |

---

The coordinates for the atoms in the QM region of the QM/MM optimized structure of TS in the doublet state.

|   | X        | Y          | Z        |
|---|----------|------------|----------|
| C | 3.294173 | -11.198717 | 3.526384 |
| H | 3.788636 | -12.17657  | 3.644656 |
| H | 4.074838 | -10.422531 | 3.480627 |
| C | 2.460415 | -11.165425 | 2.280853 |
| C | 2.304732 | -10.211823 | 1.305016 |
| H | 2.874482 | -9.297434  | 1.184347 |
| N | 1.528408 | -12.136932 | 1.965952 |
| H | 1.409959 | -13.025117 | 2.452379 |
| C | 0.843286 | -11.752312 | 0.870980 |
| H | 0.054938 | -12.35635  | 0.425054 |

|    |           |            |           |
|----|-----------|------------|-----------|
| N  | 1.288797  | -10.57764  | 0.440550  |
| O  | -4.402139 | -3.639499  | -2.472663 |
| H  | -3.746459 | -3.052295  | -2.900199 |
| H  | -3.871805 | -4.278299  | -1.932235 |
| O  | -4.713794 | -3.808003  | 1.361814  |
| H  | -5.32867  | -3.411396  | 0.659043  |
| H  | -5.275152 | -4.356553  | 1.936207  |
| O  | -3.177857 | -5.12137   | -0.514192 |
| H  | -3.71309  | -4.786038  | 0.258727  |
| H  | -2.287261 | -4.721564  | -0.430585 |
| O  | -5.876564 | -2.687969  | -0.637741 |
| H  | -5.415541 | -3.025415  | -1.488631 |
| H  | -6.770639 | -2.3767    | -0.846869 |
| O  | -2.64227  | -7.661618  | -1.104031 |
| O  | -0.324124 | -8.292944  | -2.117129 |
| H  | -2.815128 | -6.687797  | -0.904058 |
| H  | -1.725405 | -7.808274  | -1.593566 |
| Fe | 0.438540  | -9.330701  | -1.063062 |
| C  | 3.212049  | -9.939823  | -2.961667 |
| C  | -1.042772 | -12.144758 | -2.364203 |
| C  | -2.400494 | -8.506911  | 0.434625  |
| C  | 2.093876  | -6.771452  | 0.519794  |
| N  | 0.930713  | -10.696223 | -2.463281 |
| C  | 2.097813  | -10.748077 | -3.170485 |
| C  | 2.039853  | -11.787886 | -4.166013 |
| C  | 0.804297  | -12.362532 | -4.058148 |
| C  | 0.140970  | -11.705309 | -2.955792 |
| N  | -1.299231 | -10.318497 | -0.751247 |
| C  | -1.692786 | -11.522365 | -1.300171 |
| C  | -2.988881 | -11.871392 | -0.806896 |
| C  | -3.423261 | -10.816366 | -0.031519 |
| C  | -2.355194 | -9.873441  | -0.033573 |



|   |           |            |           |
|---|-----------|------------|-----------|
| N | 0.001725  | -8.053766  | 0.443313  |
| C | -1.223706 | -7.873301  | 0.983872  |
| C | -1.213107 | -6.813496  | 1.935439  |
| C | 0.076420  | -6.312939  | 1.938322  |
| C | 0.806687  | -7.076346  | 0.976702  |
| N | 2.282536  | -8.509601  | -1.202375 |
| C | 2.769447  | -7.434307  | -0.498422 |
| C | 4.115581  | -7.13013   | -0.923805 |
| C | 4.446818  | -8.056919  | -1.867887 |
| C | 3.288067  | -8.897793  | -2.039509 |
| H | 4.096938  | -10.140112 | -3.567389 |
| H | -1.515763 | -13.032983 | -2.778331 |
| H | -3.330426 | -8.232634  | 0.937982  |
| H | 2.595478  | -5.922829  | 0.983427  |

The coordinates for the atoms in the QM region of the QM/MM optimized structure of TS in the quartet state.

|   | X         | Y          | Z         |
|---|-----------|------------|-----------|
| C | 3.294729  | -11.199161 | 3.527326  |
| H | 3.789338  | -12.176861 | 3.645969  |
| H | 4.075152  | -10.422737 | 3.481350  |
| C | 2.461430  | -11.166621 | 2.281670  |
| C | 2.306273  | -10.213719 | 1.305068  |
| H | 2.875883  | -9.299181  | 1.184423  |
| N | 1.529311  | -12.138099 | 1.967318  |
| H | 1.410334  | -13.025708 | 2.454431  |
| C | 0.844773  | -11.753641 | 0.871624  |
| H | 0.055997  | -12.357355 | 0.426109  |
| N | 1.290642  | -10.579631 | 0.440461  |
| O | -4.402398 | -3.639521  | -2.472797 |
| H | -3.746595 | -3.052434  | -2.900277 |
| H | -3.872289 | -4.277741  | -1.931449 |

|    |           |            |           |
|----|-----------|------------|-----------|
| O  | -4.714299 | -3.80794   | 1.362240  |
| H  | -5.32902  | -3.411345  | 0.659285  |
| H  | -5.275774 | -4.356277  | 1.936714  |
| O  | -3.178258 | -5.120648  | -0.514029 |
| H  | -3.713421 | -4.785242  | 0.259043  |
| H  | -2.287545 | -4.721027  | -0.430567 |
| O  | -5.876415 | -2.688399  | -0.637778 |
| H  | -5.41561  | -3.025489  | -1.488993 |
| H  | -6.77059  | -2.377136  | -0.84641  |
| O  | -2.64126  | -7.660785  | -1.105574 |
| O  | -0.31791  | -8.293951  | -2.123943 |
| H  | -2.81564  | -6.68682   | -0.906567 |
| H  | -1.726536 | -7.805764  | -1.595002 |
| Fe | 0.435755  | -9.328475  | -1.062715 |
| C  | 3.211923  | -9.940743  | -2.959408 |
| C  | -1.042169 | -12.145464 | -2.363495 |
| C  | -2.400698 | -8.505952  | 0.433764  |
| C  | 2.094325  | -6.771539  | 0.520392  |
| N  | 0.931151  | -10.69865  | -2.461454 |
| C  | 2.097745  | -10.748969 | -3.169157 |
| C  | 2.039673  | -11.787423 | -4.166408 |
| C  | 0.803891  | -12.361869 | -4.059516 |
| C  | 0.141272  | -11.70616  | -2.955752 |
| N  | -1.299116 | -10.317312 | -0.751627 |
| C  | -1.692076 | -11.521832 | -1.300212 |
| C  | -2.988426 | -11.870749 | -0.80746  |
| C  | -3.423565 | -10.815343 | -0.033158 |
| C  | -2.355651 | -9.872208  | -0.03497  |
| N  | 0.001589  | -8.054346  | 0.442778  |
| C  | -1.224003 | -7.873159  | 0.983236  |
| C  | -1.212942 | -6.813304  | 1.934655  |
| C  | 0.076683  | -6.313311  | 1.937776  |

|   |           |            |           |
|---|-----------|------------|-----------|
| C | 0.806792  | -7.076914  | 0.976172  |
| N | 2.283140  | -8.509552  | -1.2003   |
| C | 2.770074  | -7.433664  | -0.498032 |
| C | 4.115855  | -7.128939  | -0.924487 |
| C | 4.446686  | -8.056332  | -1.868251 |
| C | 3.287845  | -8.89787   | -2.038268 |
| H | 4.096487  | -10.140366 | -3.565594 |
| H | -1.515785 | -13.033499 | -2.777193 |
| H | -3.330609 | -8.2319    | 0.937366  |
| H | 2.595014  | -5.922822  | 0.984654  |

The coordinates for the atoms in the QM region of the QM/MM optimized structure of I in the doublet state.

|   | X         | Y          | Z         |
|---|-----------|------------|-----------|
| C | 3.276241  | -11.18985  | 3.521917  |
| H | 3.771361  | -12.168988 | 3.632304  |
| H | 4.057547  | -10.414181 | 3.474040  |
| C | 2.428210  | -11.146602 | 2.284326  |
| C | 2.263356  | -10.185409 | 1.315830  |
| H | 2.836367  | -9.272767  | 1.195741  |
| N | 1.491725  | -12.112967 | 1.971318  |
| H | 1.379765  | -13.006991 | 2.448492  |
| C | 0.797660  | -11.718432 | 0.883325  |
| H | 0.012604  | -12.325424 | 0.435417  |
| N | 1.239342  | -10.541262 | 0.456536  |
| O | -4.406438 | -3.695435  | -2.383294 |
| H | -3.737687 | -3.128106  | -2.817472 |
| H | -3.898447 | -4.31577   | -1.798748 |
| O | -4.783995 | -3.666652  | 1.493970  |
| H | -5.383267 | -3.312192  | 0.755490  |
| H | -5.342624 | -4.227285  | 2.059048  |
| O | -3.276934 | -5.08106   | -0.329747 |

|    |           |            |           |
|----|-----------|------------|-----------|
| H  | -3.755937 | -4.65192   | 0.430154  |
| H  | -2.337515 | -4.805876  | -0.281837 |
| O  | -5.889912 | -2.674915  | -0.599768 |
| H  | -5.417002 | -3.048498  | -1.431667 |
| H  | -6.771649 | -2.350684  | -0.837996 |
| O  | -2.955836 | -7.709415  | -0.849787 |
| O  | -0.160625 | -8.328834  | -2.45894  |
| H  | -3.148145 | -6.76542   | -0.613269 |
| H  | -1.029564 | -7.966644  | -2.196099 |
| Fe | 0.464005  | -9.35887   | -1.100133 |
| C  | 3.255572  | -9.996674  | -2.963545 |
| C  | -1.029248 | -12.144664 | -2.362657 |
| C  | -2.526072 | -8.418857  | 0.313376  |
| C  | 2.053349  | -6.766042  | 0.430329  |
| N  | 0.981904  | -10.750578 | -2.459162 |
| C  | 2.149896  | -10.80439  | -3.178057 |
| C  | 2.076727  | -11.834493 | -4.179258 |
| C  | 0.832748  | -12.395115 | -4.066872 |
| C  | 0.192117  | -11.726194 | -2.959035 |
| N  | -1.343321 | -10.250987 | -0.836968 |
| C  | -1.698469 | -11.506913 | -1.353113 |
| C  | -2.996108 | -11.877245 | -0.840822 |
| C  | -3.447437 | -10.820652 | -0.099041 |
| C  | -2.394216 | -9.836956  | -0.14338  |
| N  | -0.079821 | -7.978564  | 0.278935  |
| C  | -1.265974 | -7.802863  | 0.847413  |
| C  | -1.229936 | -6.775069  | 1.853608  |
| C  | 0.051124  | -6.277057  | 1.844462  |
| C  | 0.766871  | -7.025436  | 0.846399  |
| N  | 2.308469  | -8.541219  | -1.243535 |
| C  | 2.776843  | -7.461984  | -0.561301 |
| C  | 4.127193  | -7.152194  | -0.952361 |

|   |           |            |           |
|---|-----------|------------|-----------|
| C | 4.479046  | -8.088734  | -1.887122 |
| C | 3.330479  | -8.935443  | -2.058459 |
| H | 4.144031  | -10.197711 | -3.566164 |
| H | -1.477189 | -13.0589   | -2.750731 |
| H | -3.296805 | -8.372052  | 1.104845  |
| H | 2.565651  | -5.932751  | 0.911568  |

---

The coordinates for the atoms in the QM region of the QM/MM optimized structure of I in the quartet state.

|   | X         | Y          | Z         |
|---|-----------|------------|-----------|
| C | 3.290112  | -11.177842 | 3.566312  |
| H | 3.791618  | -12.152086 | 3.684706  |
| H | 4.065882  | -10.396937 | 3.521013  |
| C | 2.450527  | -11.149561 | 2.325098  |
| C | 2.278356  | -10.199958 | 1.344426  |
| H | 2.849918  | -9.285727  | 1.211771  |
| N | 1.519142  | -12.124548 | 2.023640  |
| H | 1.409583  | -13.011682 | 2.513174  |
| C | 0.825213  | -11.738312 | 0.929032  |
| H | 0.037025  | -12.349235 | 0.489486  |
| N | 1.259838  | -10.567564 | 0.489439  |
| O | -4.408168 | -3.686138  | -2.377396 |
| H | -3.733113 | -3.1264    | -2.811367 |
| H | -3.908388 | -4.314293  | -1.79436  |
| O | -4.793508 | -3.666614  | 1.490791  |
| H | -5.388976 | -3.300785  | 0.754521  |
| H | -5.361117 | -4.219705  | 2.054311  |
| O | -3.3036   | -5.095443  | -0.330584 |
| H | -3.782171 | -4.664276  | 0.429198  |
| H | -2.360589 | -4.835174  | -0.273185 |
| O | -5.891161 | -2.654901  | -0.59755  |
| H | -5.420416 | -3.029269  | -1.429564 |

|    |           |            |           |
|----|-----------|------------|-----------|
| H  | -6.766477 | -2.314055  | -0.837099 |
| O  | -3.032072 | -7.72278   | -0.911716 |
| O  | -0.36335  | -8.356984  | -2.755522 |
| H  | -3.214586 | -6.778669  | -0.67016  |
| H  | -1.171452 | -7.879327  | -2.490962 |
| Fe | 0.395763  | -9.261543  | -1.28087  |
| C  | 3.246309  | -9.981139  | -2.99975  |
| C  | -1.057176 | -12.150532 | -2.390781 |
| C  | -2.561959 | -8.417108  | 0.242790  |
| C  | 2.055040  | -6.736511  | 0.362793  |
| N  | 0.947379  | -10.719612 | -2.507452 |
| C  | 2.130110  | -10.778039 | -3.210594 |
| C  | 2.063505  | -11.826972 | -4.189074 |
| C  | 0.819471  | -12.39208  | -4.076402 |
| C  | 0.163396  | -11.713242 | -2.987969 |
| N  | -1.395354 | -10.272519 | -0.870873 |
| C  | -1.741534 | -11.529217 | -1.38222  |
| C  | -3.040758 | -11.9008   | -0.866217 |
| C  | -3.495847 | -10.837616 | -0.135861 |
| C  | -2.442271 | -9.847094  | -0.190723 |
| N  | -0.108798 | -7.913008  | 0.125659  |
| C  | -1.288986 | -7.784254  | 0.734761  |
| C  | -1.236591 | -6.800431  | 1.776964  |
| C  | 0.040818  | -6.285128  | 1.760389  |
| C  | 0.747490  | -6.984779  | 0.727923  |
| N  | 2.322645  | -8.498439  | -1.302301 |
| C  | 2.798176  | -7.430341  | -0.610528 |
| C  | 4.159157  | -7.145955  | -0.978987 |
| C  | 4.505832  | -8.087507  | -1.912437 |
| C  | 3.343289  | -8.91193   | -2.102329 |
| H  | 4.133253  | -10.205616 | -3.595653 |
| H  | -1.483791 | -13.072464 | -2.783272 |

|   |           |           |          |
|---|-----------|-----------|----------|
| H | -3.306429 | -8.359926 | 1.059002 |
| H | 2.567908  | -5.927759 | 0.883096 |

---
